# Supplementary material for: Advances in Legionella Control by a New Formulation of Hydrogen Peroxide and Silver Salts in a Hospital Hot Water Network
Source: MDPI journal article supplement (doi:10.3390/pathogens8040209), 2019-10-29
Supplement: s1 [file s1]

## SUPPLEMENTARY MATERIALS

### **Advances in Legionella control by a new formulation of hydrogen peroxide and silver salts in a hospital hot water network**

Luna Girolamini<sup>1</sup>, Ada Dormi<sup>2</sup>, Tiziana Pellati<sup>3</sup>, Paolo Somaroli<sup>3</sup>, Davide Montanari<sup>4</sup>, Andrea Costa<sup>4</sup>, Francesca Savelli<sup>5</sup>, Andrea Martelli<sup>5</sup>, Antonella Grottola<sup>6</sup>, Giulia Fregni Serpini<sup>6</sup>, Sandra Cristino<sup>1\*</sup>

<sup>1</sup> Department of Biological, Geological, and Environmental Sciences, BiGeA, University of Bologna, Bologna, Italy  
Affiliation; [luna.girolamini2@unibo.it](mailto:luna.girolamini2@unibo.it) (LG); [sandra.cristino@unibo.it](mailto:sandra.cristino@unibo.it) (SC);

<sup>2</sup> Department of Medical and Surgical Science, DIMEC, University of Bologna, Bologna, Bologna Italy;  
[ada.dormi@unibo.it](mailto:ada.dormi@unibo.it) (AD);

<sup>3</sup> GVM Care & Research, Lugo di Ravenna, Ravenna, Italy. [tpellati@gvm-engineering.it](mailto:tpellati@gvm-engineering.it) (TP); [psomaroli@gvm-engineering.it](mailto:psomaroli@gvm-engineering.it) (PS);

<sup>4</sup> Eta-Beta S. r. l., Forlì, Forlì Cesena, Italy. [andrea@etabeta.com](mailto:andrea@etabeta.com) (AC); [manutenzione-mch@gvmnet.it](mailto:manutenzione-mch@gvmnet.it) (DM);

<sup>5</sup> Water Team S. r. l., Cesena, Forlì Cesena, Italy. [francesca@waterteam.it](mailto:francesca@waterteam.it) (FS); [andream@waterteam.it](mailto:andream@waterteam.it) (AM);

<sup>6</sup> Regional Reference Laboratory for Clinical Diagnosis of Legionellosis, Unit of Microbiology and Virology, Modena University Hospital, Modena, Italy. [grottola.antonella@aou.mo.it](mailto:grottola.antonella@aou.mo.it) (AG); [fregniserpini.giulia@aou.mo.it](mailto:fregniserpini.giulia@aou.mo.it) (GFS).

\* Correspondence: [sandra.cristino@unibo.it](mailto:sandra.cristino@unibo.it); Tel.: +39-0512094811 (S.C.)

**Figure S1:** Site map of MCH, Cotignola (RA), Italy. A representative view of MCH and a map of its three buildings: MCH picture (A) and MCH planimetry (B).

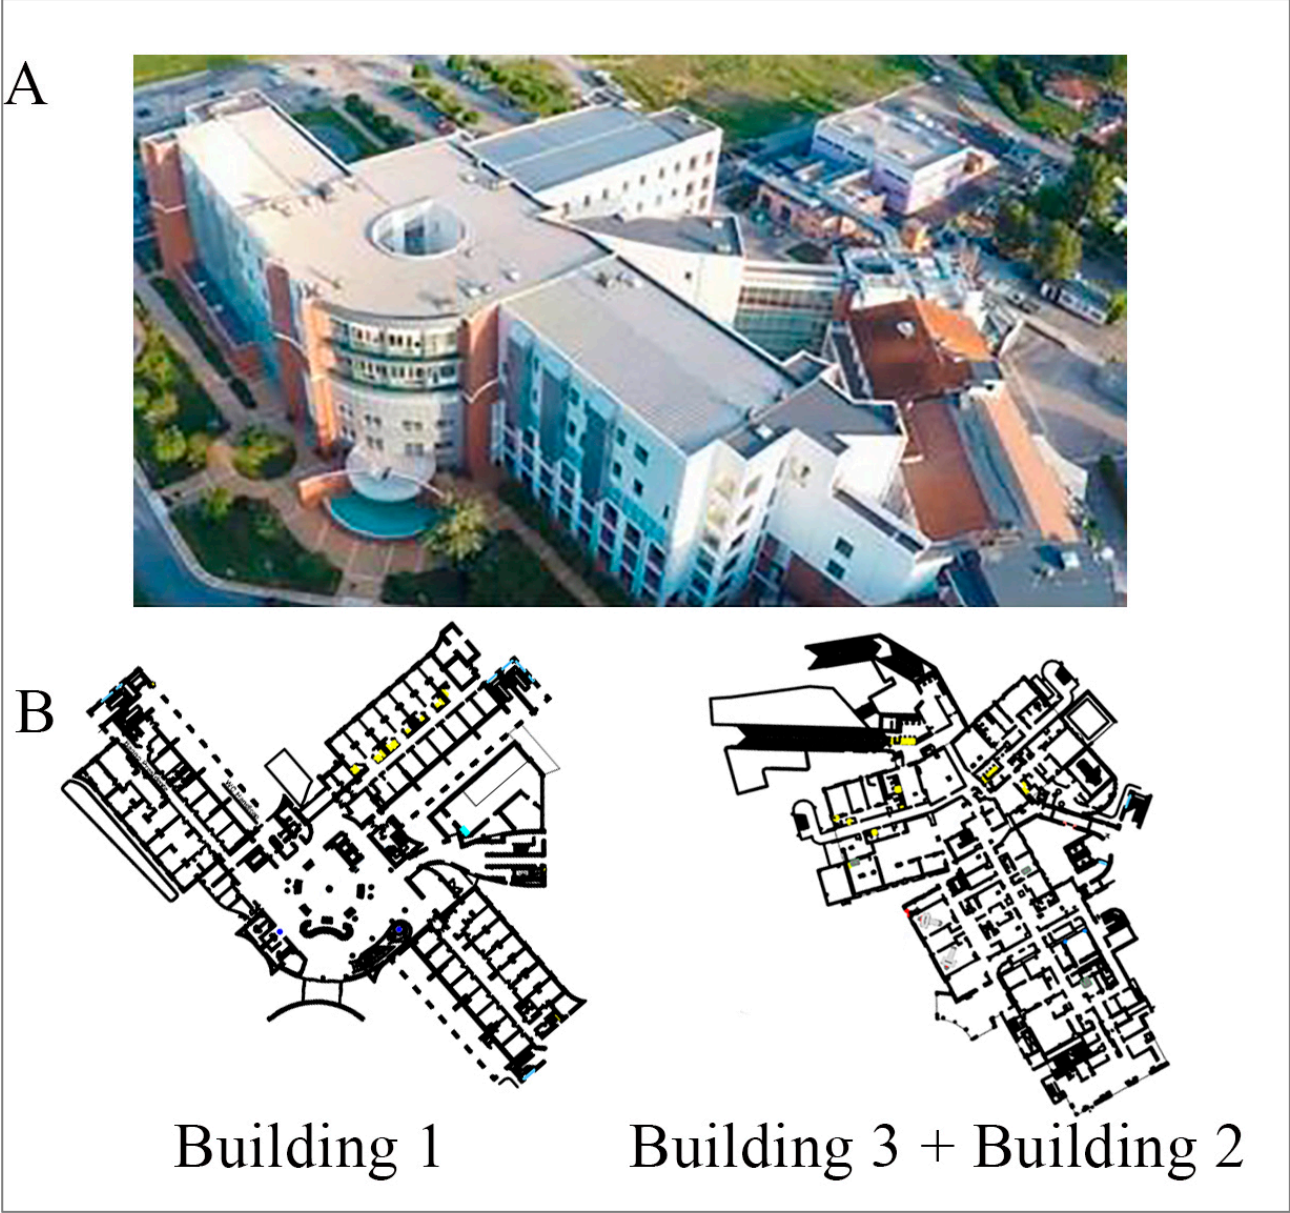

**Table S1: MCH structure and water outlet characteristics**

| <b>Building 1</b>      |                                                        |                                                   |                              |                                    |          |               |                  |                 |                                           |
|------------------------|--------------------------------------------------------|---------------------------------------------------|------------------------------|------------------------------------|----------|---------------|------------------|-----------------|-------------------------------------------|
| Area (m <sup>2</sup> ) | Plumbing type                                          | Year of construction/<br>year of works completion | Renovation time              | Shock treatment                    | Floor    | Water outlets | In-patient rooms | Sampling points | Water consumption (m <sup>3</sup> )/ year |
| 18539.93               | Galvanized iron/<br>Polyvinylchloride (PVC) multilayer | 2001/<br>2015                                     | 2005<br>2010<br>2012<br>2013 | Feb-Mar<br>2015<br>Jul-Aug<br>2015 | Floor 0  | 50            |                  | 4               | 1913                                      |
|                        |                                                        |                                                   |                              |                                    | Floor 1  | 25            |                  | 4               |                                           |
|                        |                                                        |                                                   |                              |                                    | Floor 2  | 119           | 27               | 5               |                                           |
|                        |                                                        |                                                   |                              |                                    | Floor 3  |               |                  |                 |                                           |
|                        |                                                        |                                                   |                              |                                    | Floor 4  | 73            |                  | 4               |                                           |
|                        |                                                        |                                                   |                              |                                    | Floor 5  | 36            |                  | 4               |                                           |
| Total water outlets    |                                                        |                                                   |                              |                                    |          | 303           |                  |                 |                                           |
| Total in-patient rooms |                                                        |                                                   |                              |                                    |          |               | 27               |                 |                                           |
| Total sampling points  |                                                        |                                                   |                              |                                    |          |               |                  | 21              |                                           |
| <b>Building 2</b>      |                                                        |                                                   |                              |                                    |          |               |                  |                 |                                           |
| Area (m <sup>2</sup> ) | Plumbing type                                          | Year of construction/<br>year of works completion | Renovation time              | Shock treatment                    | Floor    | Water outlets | In-patient rooms | Sampling points | Water consumption (m <sup>3</sup> )/ year |
| 8178.68                | Galvanized iron                                        | 1973/<br>1973                                     | No works                     | No shock                           | Floor -1 | 4             |                  | 1               | 3017                                      |
|                        |                                                        |                                                   |                              |                                    | Floor 0  | 65            |                  | 5               |                                           |
|                        |                                                        |                                                   |                              |                                    | Floor 1  | 92            | 25               | 5               |                                           |
|                        |                                                        |                                                   |                              |                                    | Floor 2  | 104           | 26               | 5               |                                           |
|                        |                                                        |                                                   |                              |                                    | Floor 3  | 66            | 18               | 3               |                                           |
|                        |                                                        |                                                   |                              |                                    | Floor 4  | 5             | 1                | 2               |                                           |
| Total water outlets    |                                                        |                                                   |                              |                                    |          | 336           |                  |                 |                                           |
| Total in-patient rooms |                                                        |                                                   |                              |                                    |          |               | 70               |                 |                                           |
| Total sampling points  |                                                        |                                                   |                              |                                    |          |               |                  | 21              |                                           |
| <b>Building 3</b>      |                                                        |                                                   |                              |                                    |          |               |                  |                 |                                           |
| Area (m <sup>2</sup> ) | Plumbing type                                          | Year of construction/<br>year of works completion | Renovation time              | Shock treatment                    | Floor    | Water outlets | In-patient rooms | Sampling points | Water consumption (m <sup>3</sup> )/ year |
| 1271.06                | Galvanized iron/<br>Polyvinylchloride (PVC) multilayer | 2001/<br>2015                                     | 2001<br>2014<br>2015         | No shock                           | Floor -1 | 7             |                  | 2               | 589                                       |
|                        |                                                        |                                                   |                              |                                    | Floor 0  | 3             |                  | 2               |                                           |
|                        |                                                        |                                                   |                              |                                    | Floor 1  | 6             |                  | 2               |                                           |
|                        |                                                        |                                                   |                              |                                    | Floor 2  | 4             |                  | 1               |                                           |
|                        |                                                        |                                                   |                              |                                    | Floor 3  | 59            | 14               | 3               |                                           |
|                        |                                                        |                                                   |                              |                                    | Floor 4  | 50            | 11               | 3               |                                           |
| Total water outlets    |                                                        |                                                   |                              |                                    |          | 129           |                  |                 |                                           |
| Total in-patient rooms |                                                        |                                                   |                              |                                    |          |               | 25               |                 |                                           |
| Total sampling points  |                                                        |                                                   |                              |                                    |          |               |                  | 13              |                                           |
